# Supplementary material for: Longitudinal analysis of ovarian cancer death patterns during a rapid transition period (2005-2020) in Shanghai, China: A population-based study
Source: Front Oncol. 2022 Oct 3;12:1003297. doi: 10.3389/fonc.2022.1003297 (PMC9574098; doi:10.3389/fonc.2022.1003297)
Supplement: Supplementary file 4 [file Table_4.xlsx]

## Sheet: Sheet2
Table S4. Observed and modelled proportions of ovarian cancer death of each age category in Pudong, Shanghai, China from 2005 to 2020.
			Observed						Modeled
Year	15-29 yrs	30-44 yrs	45-59 yrs	60-69 yrs	70-79 yrs	≥80 yrs		30-44 yrs	45-59 yrs	60-69 yrs	70-79 yrs	≥80 yrs
2005	0	12.2807	36.8421	10.5263	24.5614	15.7895		1.61	49.32	15.16	16.14	13.28
2006	0	4.65116	58.1395	11.6279	16.2791	9.30233		1.76	46.92	16.11	16.51	13.19
2007	4.65116	0	46.5116	25.5814	11.6279	11.6279		1.92	44.63	17.13	16.89	13.1
2008	0	3.50877	42.1053	15.7895	21.0526	17.5439		2.1	42.46	18.2	17.28	13.01
2009	3.07692	3.07692	40	21.5385	10.7692	21.5385		2.3	40.39	19.34	17.69	12.93
2010	0	4	42	26	18	10		2.51	38.42	20.56	18.1	12.84
2011	1.28205	2.5641	34.6154	21.7949	25.641	14.1026		2.74	36.55	21.85	18.51	12.76
2012	1.6129	8.06452	35.4839	27.4194	20.9677	6.45161		3	34.77	23.22	18.94	12.67
2013	1.38889	6.94444	25	26.3889	23.6111	16.6667		3.28	33.07	24.68	19.38	12.59
2014	1.36986	4.10959	39.726	23.2877	16.4384	15.0685		3.58	31.46	26.23	19.83	12.5
2015	0	2.94118	35.2941	35.2941	19.1176	7.35294		3.91	29.93	27.87	20.29	12.42
2016	0	4.49438	29.2135	35.9551	14.6067	15.7303		4.28	28.47	29.62	20.76	12.33
2017	0	2.66667	28	30.6667	16	22.6667		4.67	27.08	31.48	21.24	12.25
2018	0	5.81395	29.0698	36.0465	24.4186	4.65116		5.11	25.76	33.46	21.74	12.17
2019	1.14943	3.44828	19.5402	32.1839	27.5862	16.092		5.58	24.51	35.56	22.24	12.09
2020	2.40964	8.43373	21.6867	25.3012	27.7108	14.4578		6.1	23.31	37.79	22.75	12.01
