# Supplementary material for: Longitudinal analysis of ovarian cancer death patterns during a rapid transition period (2005-2020) in Shanghai, China: A population-based study
Source: Front Oncol. 2022 Oct 3;12:1003297. doi: 10.3389/fonc.2022.1003297 (PMC9574098; doi:10.3389/fonc.2022.1003297)
Supplement: Supplementary file 7 [file Table_7.xlsx]

## Sheet: Table
Table S7. Regional differences of age-standardized mortality rate and YLL rate
				Age-standardized mortality rate (/100,000)										Age-standardized YLL rate (/100,000)
	Exact rates					Estimated rates [value (lower, upper)]					Exact rates					Estimated rates [value (lower,upper)]
Year	Pudong		China	Global	World Bank Low Income	World Bank High Income	India	Japan	United States of America		Pudong		China	Global	World Bank Low Income	World Bank High Income	India	Japan	United States of America
2005	2.30772		2.34 (2.05,2.86)	4.59 (4.29,4.95)	2.94(2.26,4.95)	6.6(6.15,6.81)	2.90(2.39,3.68)	3.94(3.63,4.22)	7.50(7.04,7.76)		69.4192		68.75(60.00,83.64)	119.96(112.71,131.32)	82.79(63.31,147.70)	165.7(158.86,170.22)	78.15(64.77,100.87)	114.91(109.64,120.52)	181.52(174.77,187.25)
2006	1.73305		2.35 (2.06,2.87)	4.57 (4.26,4.94)	2.97(2.30,4.87)	6.54(6.10,6.73)	2.94(2.42,3.72)	3.92(3.62,4.19)	7.41(6.95,7.67)		56.9865		68.61(59.80,83.84)	119.30(111.90,130.26)	83.71(64.11,144.99)	163.74(156.91,168.07)	78.95(65.05,100.46)	114.26(109.05,120.96)	178.89(172.11,184.24)
2007	1.85873		2.36 (2.05,2.81)	4.56 (4.25,4.92)	3.01(2.35,4.85)	6.49(6.05,6.70)	2.98(2.45,3.78)	3.90(3.57,4.13)	7.34(6.88,7.62)		53.3589		68.70(59.95,81.71)	118.95(111.62,129.23)	84.72(65.18,144.00)	162.05(155.44,166.95)	79.96(66.39,103.85)	113.63(108.23,120.17)	176.41(169.78,182.39)
2008	2.05531		2.37 (2.05,2.80)	4.56 (4.24,4.93)	3.05(2.38,4.83)	6.45(6.01,6.69)	3.01(2.47,3.79)	3.89(3.56,4.11)	7.31(6.86,7.66)		64.116		68.82(59.49,81.24)	118.92(111.40,129.36)	85.82(66.64,142.45)	160.59(153.89,166.80)	80.87(66.56,103.74)	113.50(107.92,118.74)	174.88(168.23,184.17)
2009	2.36143		2.39 (2.07,2.82)	4.55 (4.24,4.91)	3.10(2.44,4.78)	6.41(5.96,6.69)	3.02(2.47,3.71)	3.90(3.57,4.14)	7.27(6.82,7.70)		73.5716		69.20(59.96,81.94)	118.89(110.86,128.76)	87.20(68.21,141.07)	159.6(152.69,166.89)	81.80(66.93,102.15)	113.97(107.74,119.14)	173.62(166.69,183.93)
2010	1.83578		2.43 (2.07,2.87)	4.49 (4.15,4.82)	3.15(2.51,4.73)	6.17(5.73,6.43)	3.02(2.47,3.74)	3.84(3.49,4.07)	6.95(6.52,7.33)		57.8638		70.02(59.91,82.73)	117.73(109.55,127.20)	88.46(69.84,139.49)	153.45(146.62,159.07)	82.51(66.71,105.26)	112.01(106.07,117.27)	165.72(158.51,175.29)
2011	2.80254		2.46 (2.07,2.92)	4.48 (4.13,4.83)	3.22(2.57,4.75)	6.12(5.68,6.36)	3.06(2.50,3.74)	3.84(3.49,4.07)	6.85(6.44,7.24)		83.7198		70.48(59.88,84.37)	117.32(108.98,127.44)	90.21(70.88,138.23)	151.86(145.17,156.70)	83.36(68.54,106.48)	111.55(105.53,116.80)	162.92(156.61,175.21)
2012	2.45335		2.46 (2.03,2.85)	4.48 (4.13,4.82)	3.28(2.64,4.77)	6.08(5.65,6.33)	3.18(2.58,3.85)	3.84(3.50,4.07)	6.78(6.38,7.20)		72.498		70.37(58.61,82.05)	117.50(108.22,126.84)	91.94(73.11,139.97)	150.50(143.57,156.04)	86.73(69.46,107.71)	111.36(105.05,116.27)	160.78(154.59,174.49)
2013	2.59805		2.48 (2.08,2.89)	4.49 (4.12,4.83)	3.35(2.72,4.80)	6.03(5.59,6.30)	3.29(2.65,3.98)	3.82(3.48,4.04)	6.69(6.29,7.18)		74.3558		70.64(59.37,82.80)	117.76(108.29,126.98)	94.09(75.07,138.21)	148.87(142.32,155.85)	89.46(71.11,110.10)	110.08(103.60,115.31)	158.56(152.47,173.58)
2014	2.53739		2.56 (2.04,2.98)	4.51 (4.12,4.85)	3.43(2.81,4.79)	5.98(5.54,6.26)	3.38(2.72,4.04)	3.80(3.45,4.02)	6.63(6.22,7.13)		78.8369		72.64(58.61,85.22)	118.54(108.51,127.96)	96.34(77.08,138.65)	147.68(140.72,155.46)	92.02(73.44,110.53)	109.47(103.24,114.52)	157.05(150.81,172.34)
2015	2.15078		2.56 (1.97,3.04)	4.48 (4.07,4.84)	3.50(2.89,4.76)	5.81(5.37,6.11)	3.49(2.83,4.17)	3.72(3.37,3.98)	6.43(5.99,6.91)		72.1607		72.40(56.68,86.56)	118.05(106.76,128.17)	98.29(79.70,137.78)	143.17(135.11,150.44)	95.05(75.92,116.07)	107.08(99.62,113.50)	152.22(144.64,167.67)
2016	2.60796		2.55 (1.85,3.05)	4.48 (4.05,4.85)	3.58(2.96,4.88)	5.79(5.34,6.11)	3.58(2.85,4.27)	3.71(3.36,3.96)	6.41(5.94,6.85)		88.4108		71.87(53.57,86.56)	118.41(107.24,128.78)	100.68(81.78,139.68)	142.66(134.71,150.29)	97.45(76.69,117.68)	106.43(99.43,112.77)	151.68(143.51,166.49)
2017	2.06233		2.65 (1.96,3.22)	4.50 (4.02,4.91)	3.66(3.04,4.89)	5.77(5.29,6.13)	3.64(2.85,4.37)	3.70(3.33,3.96)	6.40(5.94,6.86)		69.2925		74.62(56.18,91.37)	119.33(107.31,130.84)	102.83(83.36,141.62)	142.52(133.50,151.02)	98.91(76.64,121.90)	106.02(97.76,113.42)	151.91(143.11,167.27)
2018	2.66193		2.73 (1.96,3.37)	4.54 (4.03,4.97)	3.74(3.09,4.94)	5.77(5.27,6.18)	3.72(2.86,4.56)	3.68(3.30,3.98)	6.40(5.89,6.92)		86.9379		77.00(55.99,95.44)	120.44(106.98,133.20)	105.00(84.88,144.19)	142.47(132.94,152.16)	100.85(76.30,124.86)	105.47(96.64,113.97)	151.74(142.62,165.39)
2019	2.38232		2.77 (2.01,3.50)	4.56 (4.03,5.00)	3.78(3.09,4.95)	5.79(5.27,6.23)	3.78(2.87,4.71)	3.68(3.27,3.97)	6.47(5.94,7.00)		76.5813		78.04(57.49,99.99)	121.08(106.41,134.29)	106.11(85.40,142.40)	142.69(132.28,154.10)	102.41(76.38,129.04)	105.29(95.32,113.58)	152.46(142.73,165.99)
*Data source: Global Burden of Disease 2019
YYL, years of life lost
